# Supplementary material for: Validating the reconstruction of DNA silver nanoclusters induced by different DNA sequence via HPLC and exploring the optical properties of reconstructed DNA silver nanoclusters
Source: Royal Society of Chemistry journal article supplement (doi:10.1039/d3nj05417a), 2024-01-01
Supplement: d3nj05417a1.pdf [file d3nj05417a1.pdf]

## **Supporting information**

# **Validating DNA-Induced Silver Nanocluster Reconstruction via HPLC and Exploring Their Optical Properties for DNA Sequence Labeling**

Tzu-Pei Chou, Po-Wei Chang, Abizard Sarno Faraz Raufa and Chih-Wei Chang<sup>\*</sup>

Department of Chemistry, National Changhua University of Education, Taiwan

<sup>\*</sup>Corresponding author: [cwchang@cc.ncue.edu.tw](mailto:cwchang@cc.ncue.edu.tw)

|                                                                                                                                                                                                    |   |
|----------------------------------------------------------------------------------------------------------------------------------------------------------------------------------------------------|---|
| Fig. S1: The fluorescence quantum yield of the DNA ( $\alpha$ ) AgNCs excited at (a) 480 nm and (b) 620 nm; (c) the fluorescence quantum yield of the DNA ( $\beta$ ) AgNCs excited at 580 nm. ... | 3 |
| Fig. S2: The emission spectra of DNA( $\alpha$ ) AgNCs and DNA( $\beta$ ) AgNCs upon 450 nm excitation. ....                                                                                       | 4 |
| Fig. S3: The steady state emission spectra of NCB AgNCs and NCB AgNCs+NCB <sup>comp</sup> .....                                                                                                    | 5 |
| Table S1: The abbreviations and sequences of the DNA used in this study .....                                                                                                                      | 6 |
| Table S2: The reaction conditions for the synthesis of DNA AgNCs.....                                                                                                                              | 7 |

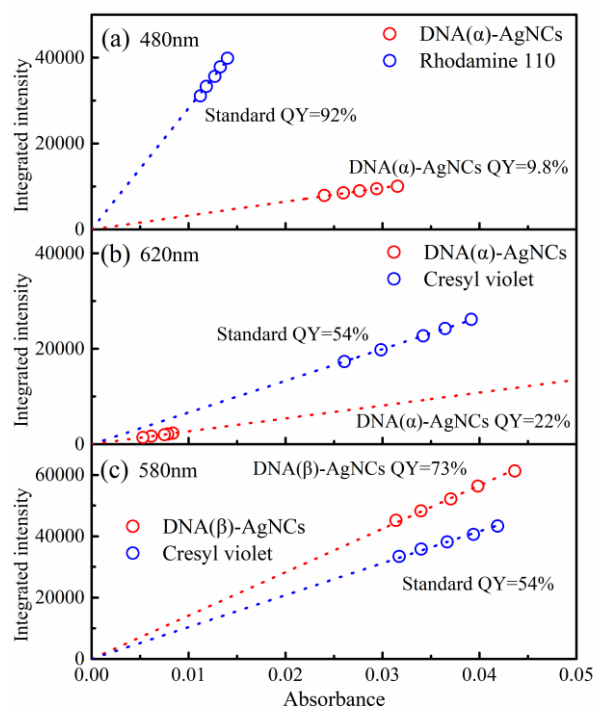

Fig. S1: The fluorescence quantum yield of the DNA ( $\alpha$ ) AgNCs excited at (a) 480 nm and (b) 620 nm; (c) the fluorescence quantum yield of the DNA ( $\beta$ ) AgNCs excited at 580 nm.

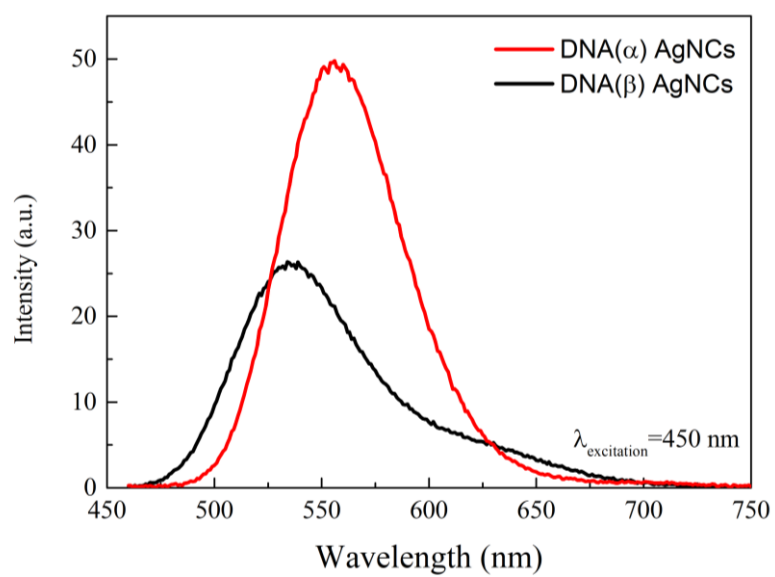

Fig. S2: The emission spectra of DNA( $\alpha$ ) AgNCs and DNA( $\beta$ ) AgNCs upon 450 nm excitation.

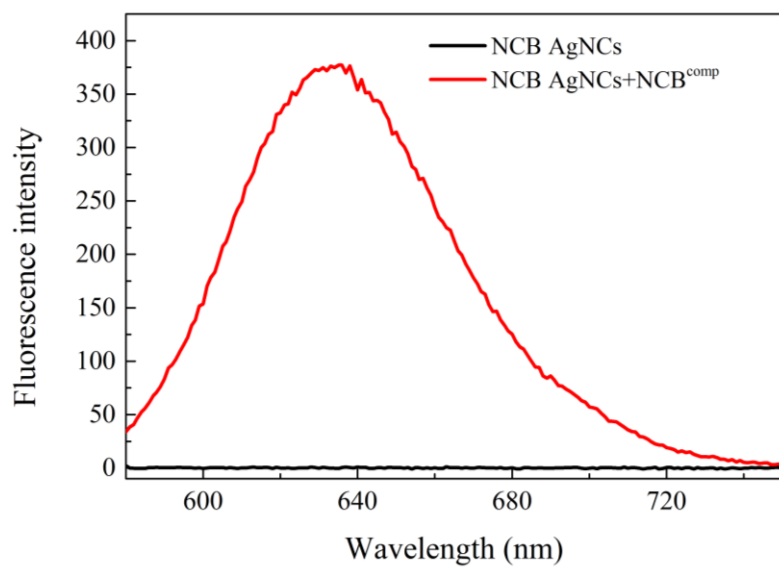

Fig. S<sub>3</sub>:The steady state emission spectra of NCB AgNCs and NCB AgNCs+NCB<sup>comp</sup>

Table S<sub>1</sub>: The abbreviations and sequences of the DNA used in this study

| DNA                 | Sequence (5'→3')                                     |
|---------------------|------------------------------------------------------|
| DNA( $\alpha$ )     | CGCCCCCCTTGGCGT                                      |
| DNA( $\beta$ )      | TTCCCACCCACCCCGGCC                                   |
| Hum 22              | AGGGTTAGGGTTAGGGTTAGGG                               |
| NCB                 | CCCTTAATCCCCTATAATAAATTTTAAATATTATTTATTAAT           |
| NCB <sup>comp</sup> | ATTAATAAATAATATTTAAAATTTATTATAGGGTGGGGTGGGG<br>TGGGG |

Table S<sub>2</sub>: The reaction conditions for the synthesis of DNA AgNCs.

| DNA sequences       | DNA:AgNO <sub>3</sub> :NaBH <sub>4</sub> ( $\mu$ M) | Reaction temperature and time | Buffer                         |
|---------------------|-----------------------------------------------------|-------------------------------|--------------------------------|
| DNA( $\alpha$ )     | 50:500:120                                          | 25°C (1 hour)                 | 10 mM ammonium acetate, pH=7.0 |
| DNA( $\beta$ )      | 50:500:250                                          | 25°C (1.5 hours)              | 10 mM ammonium acetate, pH=7.0 |
| Hum 22              | 30:180:180                                          | 4°C (12 hours)                | water                          |
| NCB                 | 15:90:90                                            | 25°C (18 hours)               | 20 mM phosphate buffer, pH=6.6 |
| NCB <sup>comp</sup> | 15:90:90                                            | 25°C (18 hours)               | 20 mM phosphate buffer, pH=6.6 |
